# Supplementary material for: Symptom-Specific Hospital Contacts in 12–18-Year-Olds Vaccinated against COVID-19: A Danish Register-Based Cohort Study
Source: MDPI journal article supplement (doi:10.3390/vaccines11061049), 2023-05-31
Supplement: s1 [file s1]

## Supplemental Information

Supplement to: Berg SK, Wallach-Kildemoes H, Rasmussen LR, et al. Symptom-specific hospital contacts in 12-18-year-olds vaccinated against COVID-19: A Danish register-based cohort study

|                                                                                                                                                                                                                                                                                 |   |
|---------------------------------------------------------------------------------------------------------------------------------------------------------------------------------------------------------------------------------------------------------------------------------|---|
| Investigators.....                                                                                                                                                                                                                                                              | 2 |
| Supplemental Table S1. Selected ICD-10 R codes as outcomes. ....                                                                                                                                                                                                                | 3 |
| Supplemental Table S2. Joint binary register-based measures for prevalent somatic and psychiatric disorders prior to first dose vaccine index-date, applying hospital diagnosis (ICD 10 codes) and eventually medicine proxies (ATC-codes) with specified look back period..... | 4 |
| Supplemental Table S3. Characteristics of adolescents vaccinated against COVID-19 and matched unvaccinated: First dose during May-September and second dose 3-7 weeks later.....                                                                                                | 5 |
| Supplemental Table S4. PERR and number of symptoms (ICD-10 R-codes) per 1000 person years at risk (rates) 6 months before and 21 days after the first vaccine dose (index-date) among vaccinated and matched unvaccinated adolescents aged 12-18 years.....                     | 6 |
| Supplemental Table S5. Symptoms for first and second vaccine dose: Events 6 months before and three time periods after vaccination (index-date) among vaccinated and matched unvaccinated adolescents aged 12-18 years, stratified on age-groups.....                           | 7 |

## Investigators

**Selina Kikkenborg Berg <sup>1,2,\*</sup>, Helle Wallach-Kildemoes <sup>1</sup>, Line Ryberg Rasmussen <sup>1</sup>, Ulrikka Nygaard <sup>2,3</sup>,  
Nina Marie Birk <sup>1</sup>, Henning Bundgaard <sup>1,2</sup>, Annette Kjær Ersbøll <sup>4</sup>, Lau Caspar Thygesen <sup>4</sup>, Susanne Dam Nielsen <sup>2,5</sup>  
and Anne Vinggaard Christensen <sup>1</sup>**

<sup>1</sup> Department of Cardiology, Rigshospitalet, Copenhagen University Hospital, Inge Lehmanns Vej 7,  
2100 Copenhagen, Denmark

<sup>2</sup> Faculty of Health and Medical Sciences, University of Copenhagen, Blegdamsvej 3B,  
2200 Copenhagen, Denmark

<sup>3</sup> Department of Paediatrics and Adolescents Medicine, Rigshospitalet, Copenhagen University Hospital,  
Blegdamsvej 9, 2100 Copenhagen, Denmark

<sup>4</sup> National Institute of Public Health, University of Southern Denmark, Studiestræde 6,  
1455 Copenhagen, Denmark

<sup>5</sup> Department of Infectious Disease, Rigshospitalet, Copenhagen University Hospital, Blegdamsvej 9,  
2100 Copenhagen, Denmark

\* Correspondence: selina@rh.dk

**Supplemental Table S1. Selected ICD-10 R codes as outcomes.**

| <b>R codes categories</b>                            | <b>Specific R codes</b>                                                                    |
|------------------------------------------------------|--------------------------------------------------------------------------------------------|
| Circulatory and respiratory symptoms                 | R00 Abnormalities of heartbeat                                                             |
|                                                      | R04 Haemorrhage from respiratory passages                                                  |
|                                                      | R05 Cough                                                                                  |
|                                                      | R06 Abnormalities of breathing                                                             |
|                                                      | R07 Pain in throat and chest                                                               |
|                                                      | R09 Other symptoms and signs involving the circulatory and respiratory systems             |
| Digestive system and abdomen                         | R10 Abdominal and pelvic pain                                                              |
|                                                      | R11 Nausea and vomiting                                                                    |
|                                                      | R13 Dysphagia                                                                              |
| Skin and subcutaneous tissue                         | R20 Disturbances of skin sensation                                                         |
|                                                      | R21 Rash and other nonspecific skin eruption                                               |
|                                                      | R22 Localized swelling, mass and lump of skin and subcutaneous tissue                      |
| Cognition, perception, emotional state, and behavior | R41.8 Other and unspecified symptoms and signs involving cognitive functions and awareness |
|                                                      | R42 Dizziness and giddiness                                                                |
|                                                      | R43 Disturbances of smell and taste                                                        |
| General symptoms and signs                           | R50 Fever of other and unknown origin                                                      |
|                                                      | R51 Headache                                                                               |
|                                                      | R52 Pain, not elsewhere classified                                                         |
|                                                      | R53 Malaise and fatigue                                                                    |
|                                                      | R55 Syncope and collapse                                                                   |
|                                                      | R56 Convulsions, not elsewhere classified                                                  |
|                                                      | R59 Enlarged lymph nodes                                                                   |

**Supplemental Table S2. Joint binary register-based measures for prevalent somatic and psychiatric disorders prior to first dose vaccine index-date, applying hospital diagnosis (ICD 10 codes) and eventually medicine proxies (ATC-codes) with specified look back period.**

| Disorder categories                                                 | Register-based disorder definitions <sup>a</sup> :<br>Prior diagnosis (ICD 10) / filled of prescription drug (ATC) | Look back period <sup>b</sup> |
|---------------------------------------------------------------------|--------------------------------------------------------------------------------------------------------------------|-------------------------------|
| Asthma <sup>c</sup>                                                 | <b>ICD10</b>                                                                                                       |                               |
|                                                                     | J45-J46                                                                                                            | Full                          |
|                                                                     | <b>ATC</b>                                                                                                         |                               |
|                                                                     | Bronchodilating agents(comb): R03BA; R03AK; R03AL08; R03AL09; R03AL11-12; R03AC12- R03AC19; R03BB01;               | Medium                        |
|                                                                     | Leukotriene receptor antagonist: R03DC03                                                                           | Medium                        |
| Other respiratory disorders <sup>c</sup>                            | <b>ICD10</b>                                                                                                       |                               |
|                                                                     | E84; J41-44; J47; J84; J96.1; P27;                                                                                 | Full                          |
|                                                                     | J40                                                                                                                | Short                         |
| Cardiovascular disorders <sup>c</sup>                               | <b>ICD10</b>                                                                                                       |                               |
|                                                                     | I05-I09; I27; I34-39; I41-I47; I50-I52                                                                             | Full                          |
|                                                                     | I01; I31; I33; I40                                                                                                 | Medium                        |
| Renal disorders incl. dialysis <sup>c</sup>                         | <b>ICD10:</b>                                                                                                      |                               |
|                                                                     | N03; N04-5; N07-8; N18-19; N25-N27; Y84.1                                                                          | Full                          |
|                                                                     | N00-1; N17                                                                                                         | Medium                        |
| Diabetes mellitus I or II <sup>c</sup>                              | <b>ICD10:</b>                                                                                                      |                               |
|                                                                     | E10-E11; Z96.4                                                                                                     | Full                          |
|                                                                     | <b>ATC:</b>                                                                                                        |                               |
|                                                                     | A10A                                                                                                               | Medium                        |
| Endocrine disorders. excl. diabetes <sup>c</sup>                    | <b>ICD10</b>                                                                                                       |                               |
|                                                                     | E03.3; E03.5-9; E05-06; E27.1; E27.3-4                                                                             | Full                          |
|                                                                     | E27.2                                                                                                              | Short                         |
| Hematologic disorders <sup>c</sup>                                  | <b>ICD10</b>                                                                                                       |                               |
|                                                                     | D59.0-1; D69.0; D69.3; D86                                                                                         | Full                          |
| Dermatologic diseases <sup>c</sup>                                  | <b>ICD10</b>                                                                                                       |                               |
|                                                                     | L10; L12; L13.0                                                                                                    | Medium                        |
|                                                                     | L20; L40; L63; L80                                                                                                 | Full                          |
| Rheumatological disorders <sup>c</sup>                              | <b>ICD10</b>                                                                                                       |                               |
|                                                                     | M05-M09; M30-36; M45; M60 (excl. M60.0)                                                                            | Full                          |
| Neuromuscular disorders <sup>c</sup>                                | <b>ICD10</b>                                                                                                       |                               |
|                                                                     | G35-37; G70-71; G80; G82                                                                                           | Full                          |
|                                                                     | G61;                                                                                                               | Medium                        |
| Gastrointestinal disorders incl. cirrhosis (any cause) <sup>c</sup> | <b>ICD10</b>                                                                                                       |                               |
|                                                                     | K50-51; K70.2-3; K71.7; K74; K76.1; K78.8; K900;                                                                   | Full                          |
|                                                                     | K35                                                                                                                | Short                         |
| Congenital malformations and chromosomal abnormalities <sup>c</sup> | <b>ICD10</b>                                                                                                       |                               |
|                                                                     | Q20-28; Q31-34; Q90-95                                                                                             | Full                          |
| Malignancy <sup>c</sup>                                             | <b>ICD10</b>                                                                                                       |                               |
|                                                                     | C00-97                                                                                                             | Full                          |
|                                                                     | <b>ATC</b>                                                                                                         |                               |
|                                                                     | L01                                                                                                                | Full                          |
| Organ transplantation or immunodeficiency <sup>c</sup>              | <b>ICD 10</b>                                                                                                      |                               |
|                                                                     | Organ transplantation: Z94 excl. Z94.5. Z94.7                                                                      | Full                          |
|                                                                     | Immunodeficiency: D70-72; D730; D80-84                                                                             | Full                          |
|                                                                     | <b>ATC</b>                                                                                                         |                               |
|                                                                     | L04                                                                                                                | Full                          |
| Psychiatric disorders <sup>d</sup>                                  | <b>ICD10</b>                                                                                                       |                               |
|                                                                     | F (any psychiatric primary diagnoses)                                                                              | Full                          |

<sup>a</sup>Individuals with a list of disorders within a look back period prior to survey completion date were identified, applying individual-level register information, corresponding to primary discharge diagnoses (ICD-10 codes) and/or prescription drug use disease proxies (ATC codes). The list includes somatic health conditions in adolescents conferring an increased risk of SARS-CoV-2 infection<sup>46</sup> along with any psychiatric discharge disorders.

<sup>b</sup>Looking back periods from the index-date: Full (ICD: full historic); Medium (ICD: 1 year; ATC: 6 months); Short (ICD: 3 months; ATC: 2 month); Very short: 14 days (ICD & ATC).

<sup>c</sup>A joint binary measure for prevalent somatic disorder: Yes (Yes in any of the listed prevalent disorders) No (No as to all included prevalent disorders).

<sup>d</sup>A joint measure for prevalent psychiatric disorder.

**Supplemental Table S3. Characteristics of adolescents vaccinated against COVID-19 and matched unvaccinated: First dose during May-September and second dose 3-7 weeks later.**

| Category                                                 | First dose vaccine <sup>a</sup> |                | Second dose vaccine <sup>b</sup> |                                     |                |                |
|----------------------------------------------------------|---------------------------------|----------------|----------------------------------|-------------------------------------|----------------|----------------|
|                                                          | Vaccinated                      | Unvaccinated   | Vaccinated                       | Unvaccinated according to follow-up |                |                |
|                                                          |                                 |                |                                  | 0-21 days                           | 0-56 days      | 57-182 days    |
| <b>All n (%)<sup>c</sup></b>                             | (n=109,166)                     | (n=109,166)    | (n=105,316)                      | (n=105,316)                         | (n=105,316)    | (n=105,316)    |
| <b>Unique individuals, n (%)<sup>d</sup></b>             | 109,166 (100.0%)                | 27,106 (39.4%) | 105,316 (100.0%)                 | 25,415 (24.1%)                      | 21,833 (20.7%) | 14,007 (13.3%) |
| <b>Sex (Girl, %)</b>                                     | 53,423 (48.9%)                  | 53,423 (48.9%) | 51,665 (49.1%)                   | 51,665 (49.1%)                      | 51,665 (49.1%) | 51,665 (49.1%) |
| <b>Age (mean, SD)</b>                                    | 15.6 (1.9)                      | 15.4 (2.1)     | 15.5 (1.9)                       | 15.4 (2.1)                          | 15.4 (2.1)     | 15.4 (2.1)     |
| <b>12 - 15 years (%)</b>                                 | 47,719 (43.7%)                  | 47,719 (43.7%) | 46,733 (44.4%)                   | 46,733 (44.4%)                      | 46,733 (44.4%) | 46,733 (44.4%) |
| <b>16 - 18 years (%)</b>                                 | 61,447 (56.3%)                  | 61,447 (56.3%) | 58,583 (55.6%)                   | 58,583 (55.6%)                      | 58,583 (55.6%) | 58,583 (55.6%) |
| <b>Prevalent health condition, n/yes (%)<sup>e</sup></b> |                                 |                |                                  |                                     |                |                |
| <b>Any of listed somatic diseases</b>                    | 14,456 (13.2%)                  | 12,961 (11.9%) | 13,971 (13.3%)                   | 12,220 (11.6%)                      | 12,324 (11.7%) | 12,197 (11.6%) |
| <b>Any registered psychiatric diagnosis</b>              | 8780 (8.0%)                     | 10,054 (9.2%)  | 8377 (8.0%)                      | 9966 (9.5%)                         | 10,284 (9.8%)  | 10,468 (9.9%)  |
| <b>Parental socio-economic position</b>                  |                                 |                |                                  |                                     |                |                |
| <b>Highest formal parental education, n (%)</b>          |                                 |                |                                  |                                     |                |                |
| <b>Basic education</b>                                   | 5087 (4.7%)                     | 13,098 (12.0%) | 4737 (4.5%)                      | 14,890 (14.1%)                      | 15,230 (14.5%) | 17,631 (16.7%) |
| <b>High school and vocational training</b>               | 44,777 (41.0%)                  | 50,522 (46.3%) | 43,245 (41.1%)                   | 49,746 (47.2%)                      | 50,777 (48.2%) | 52,260 (49.6%) |
| <b>Higher education</b>                                  | 59,302 (54.3%)                  | 45,546 (41.7%) | 57,334 (54.4%)                   | 40,680 (38.6%)                      | 39,309 (37.3%) | 35,425 (33.6%) |
| <b>Annual family income, n (%)</b>                       |                                 |                |                                  |                                     |                |                |
| <b>Low (1. tertile)</b>                                  | 29,055 (26.6%)                  | 50,078 (45.9%) | 27,615 (26.2%)                   | 53,858 (51.1%)                      | 54,884 (52.1%) | 59,961 (56.9%) |
| <b>Middle (2. tertile)</b>                               | 34,172 (31.3%)                  | 31,824 (29.2%) | 33,168 (31.5%)                   | 29,595 (28.1%)                      | 29,734 (28.2%) | 28,450 (27.0%) |
| <b>High (3. tertile)</b>                                 | 45,359 (41.6%)                  | 26,296 (24.1%) | 43,984 (41.8%)                   | 20,857 (19.8%)                      | 19,715 (18.7%) | 15,901 (15.1%) |
| <b>Maternal citizenship, n (%)</b>                       |                                 |                |                                  |                                     |                |                |
| <b>Danish</b>                                            | 101,063 (92.6%)                 | 89,218 (81.7%) | 97,754 (92.8%)                   | 82,554 (78.4%)                      | 82,037 (77.9%) | 78,905 (74.9%) |
| <b>Other Western countries</b>                           | 3261 (3.0%)                     | 5194 (4.8%)    | 3089 (2.9%)                      | 5685 (5.4%)                         | 5922 (5.6%)    | 6778 (6.4%)    |
| <b>Non-western countries</b>                             | 4621 (4.2%)                     | 14,160 (13.0%) | 4277 (4.1%)                      | 16,409 (15.6%)                      | 16,684 (15.8%) | 18,928 (18.0%) |
| <b>Unknown</b>                                           | 221 (0.2%)                      | 594 (0.5%)     | 196 (0.2%)                       | 668 (0.6%)                          | 673 (0.6%)     | 705 (0.7%)     |

<sup>a</sup>Applying matching with replacement, unvaccinated were each week during the inclusion period (May-September 2021) matched to first dose vaccinated according to sex and age-group. Hence, unvaccinated may receive the vaccine during the inclusion period and be matched with an individual still unvaccinated. By the end of the inclusion period 27,058 unique individuals were still unvaccinated.

<sup>b</sup>Applying matching with replacement, unvaccinated were each week matched to second dose vaccinated according to sex and age-group. Merely individuals not receiving first dose vaccine during the respective follow-up periods were included.

<sup>c</sup>Matched number of index-date records applied in the analyses. Individuals still unvaccinated may have been assigned several index-dates. Index-date among vaccinated = date of vaccination. Prevalent health conditions and parental socio-economic position are based on these matched number of index-date records.

<sup>d</sup>Number unique individual applied for the matching. By the end of the inclusion period 27,058 individuals had not received first dose vaccine.

<sup>e</sup>Somatic or psychiatric disorders registered prior to first dose vaccine index-date: For details see Supplemental Table 2.

**Supplemental Table S4. PERR<sup>a</sup> and number of symptoms (ICD-10 R-codes)<sup>b</sup> per 1000 person years at risk (rates) 6 months before and 21 days after the first vaccine dose (index-date) among vaccinated and matched unvaccinated adolescents aged 12-18 years.**

|                                                                                            | Girls               |       |                   |       |            |                            | Boys                |       |                   |       |            |                            |
|--------------------------------------------------------------------------------------------|---------------------|-------|-------------------|-------|------------|----------------------------|---------------------|-------|-------------------|-------|------------|----------------------------|
|                                                                                            | Unvaccinated (Rate) |       | Vaccinated (Rate) |       |            |                            | Unvaccinated (Rate) |       | Vaccinated (Rate) |       |            |                            |
|                                                                                            | before              | after | before            | after | PERR crude | PERR (95% CI) <sup>c</sup> | before              | after | before            | after | PERR crude | PERR (95% CI) <sup>c</sup> |
| <b>1. Vaccine</b>                                                                          |                     |       |                   |       |            |                            |                     |       |                   |       |            |                            |
| <b>(0-21 days)</b>                                                                         |                     |       |                   |       |            |                            |                     |       |                   |       |            |                            |
| R00 Abnormalities of heartbeat                                                             | 1.67                | 1.95  | 2.24              | 2.93  | 1.12       | 1.23 (0.34-#)              | -                   | -     | -                 | -     | -          | -                          |
| R06 Abnormalities of breathing                                                             | 5.93                | 11.06 | 5.31              | 4.23  | 0.43       | 0.35 (0.14-1.26)           | -                   | -     | -                 | -     | -          | -                          |
| R07 Pain in throat and chest                                                               | 3.37                | 9.76  | 3.48              | 4.23  | 0.42       | 0.46 (0.18-1.05)           | 3.53                | 2.49  | 2.62              | 6.86  | 3.71       | 4.70 (1.68-21.33)          |
| R10 Abdominal and pelvic pain                                                              | 47.41               | 42.95 | 44.54             | 38.08 | 0.94       | 0.91 (0.65-1.42)           | 15.84               | 18.40 | 15.27             | 14.66 | 0.83       | 0.90 (0.46-1.84)           |
| R21 Rash and other nonspecific skin eruption                                               | -                   | -     | -                 | -     | -          | -                          | 0.71                | 2.18  | 0.75              | 1.56  | 0.68       | 0.63 (0.11-4.08)           |
| R41.8 Other and unspecified symptoms and signs involving cognitive functions and awareness | 39.01               | 20.82 | 23.48             | 21.81 | 1.74       | 1.72 (1.10-2.96)           | 33.05               | 41.17 | 23.22             | 19.34 | 0.67       | 0.61 (0.32-1.45)           |
| R42 Dizziness and giddiness                                                                | 3.04                | 3.25  | 3.44              | 2.60  | 0.71       | 0.86 (0.11-#)              | -                   | -     | -                 | -     | -          | -                          |

<sup>a</sup>PERR (Prior event rate ratio) = Ratio after (Vaccinated Rate after/Unvaccinated Rate after) divided by the Ratio before (Vaccinated Rate before/Unvaccinated Rate before).

<sup>b</sup>For the number of events for each symptom see Supplemental Table 5.

<sup>v</sup>By means of Poisson regression models, the ratio before and after is adjusted for time with SARS-CoV-2 infection in the follow-up period, highest attained parental education and age group (12-15 years and 16-18 years during inclusion period). 95% confidence interval (CI) of the PERR estimate through Bootstrapping with 200 replicates.

<sup>#</sup> Not possible to calculate the upper 95% CI (e.g., e+07).

**Supplemental Table S5. Symptoms for first and second vaccine dose: Events 6 months before and three time periods<sup>a</sup> after vaccination (index-date) among vaccinated and matched unvaccinated adolescents aged 12-18 years, stratified on age-groups.**

| Diagnoses by length of follow-up period              |                                                                                            | Non-vaccinated: Events (before/after) |              |               |              | Vaccinated: Events (before/after) |              |               |              |
|------------------------------------------------------|--------------------------------------------------------------------------------------------|---------------------------------------|--------------|---------------|--------------|-----------------------------------|--------------|---------------|--------------|
|                                                      |                                                                                            | Girls                                 |              | Boys          |              | Girls                             |              | Boys          |              |
|                                                      |                                                                                            | 12-18                                 |              | 12-18         |              | 12-18                             |              | 12-18         |              |
|                                                      |                                                                                            | <i>before</i>                         | <i>after</i> | <i>before</i> | <i>after</i> | <i>before</i>                     | <i>after</i> | <i>before</i> | <i>after</i> |
|                                                      | <b>1. vaccine</b>                                                                          |                                       |              |               |              |                                   |              |               |              |
|                                                      | <b><i>Very-short (0-21 days)</i></b>                                                       |                                       |              |               |              |                                   |              |               |              |
| Circulatory and respiratory symptoms                 | R00 Abnormalities of heartbeat                                                             | 45                                    | 6            | 29            | <5           | 60                                | 9            | 47            | 10           |
|                                                      | R04 Haemorrhage from respiratory passages                                                  | 37                                    | 0            | 14            | <5           | 13                                | <5           | 24            | 5            |
|                                                      | R05 Cough                                                                                  | 35                                    | <5           | 29            | 0            | 55                                | <5           | 21            | <5           |
|                                                      | R06 Abnormalities of breathing                                                             | 160                                   | 34           | 57            | 9            | 142                               | 13           | 56            | <5           |
|                                                      | R07 Pain in throat and chest                                                               | 91                                    | 30           | 99            | 8            | 93                                | 13           | 73            | 22           |
|                                                      | R09 Other symptoms and signs involving the circulatory and respiratory systems             | 8                                     | 0            | 0             | 0            | <5                                | 0            | 0             | 0            |
| Digestive system and abdomen                         | R10 Abdominal and pelvic pain                                                              | 1277                                  | 132          | 445           | 59           | 1191                              | 117          | 426           | 47           |
|                                                      | R11 Nausea and vomiting                                                                    | 97                                    | <5           | 97            | <5           | 107                               | 9            | 59            | <5           |
|                                                      | R13 Dysphagia                                                                              | 17                                    | <5           | 30            | <5           | 38                                | 0            | 14            | 0            |
| Skin and subcutaneous tissue                         | R20 Disturbances of skin sensation                                                         | 18                                    | 5            | 10            | <5           | 23                                | <5           | 8             | 0            |
|                                                      | R21 Rash and other nonspecific skin eruption                                               | 33                                    | 8            | 20            | 7            | 30                                | <5           | 21            | 5            |
|                                                      | R22 Localized swelling, mass and lump of skin and subcutaneous tissue                      | 14                                    | <5           | 24            | <5           | 18                                | <5           | 22            | 5            |
| Cognition, perception, emotional state, and behavior | R41.8 Other and unspecified symptoms and signs involving cognitive functions and awareness | 1052                                  | 64           | 928           | 132          | 628                               | 67           | 648           | 62           |
|                                                      | R42 Dizziness and giddiness                                                                | 82                                    | 10           | 46            | 6            | 92                                | 8            | 36            | <5           |
|                                                      | R43 Disturbances of smell and taste                                                        | 20                                    | 0            | <5            | 0            | 5                                 | 0            | 9             | <5           |
| General symptoms and signs                           | R50 Fever                                                                                  | 93                                    | 15           | 24            | <5           | 76                                | <5           | 55            | <5           |
|                                                      | R51 Headache                                                                               | 433                                   | 38           | 128           | 27           | 408                               | 35           | 163           | 15           |
|                                                      | R52 Pain                                                                                   | 116                                   | <5           | 84            | 12           | 171                               | 11           | 83            | <5           |
|                                                      | R53 Fatigue                                                                                | 34                                    | <5           | 10            | <5           | 46                                | <5           | <5            | <5           |
|                                                      | R55 Syncope                                                                                | 284                                   | 44           | 61            | <5           | 187                               | 32           | 87            | 21           |
|                                                      | R56 Convulsion                                                                             | 29                                    | <5           | <5            | <5           | 43                                | <5           | 24            | <5           |
|                                                      | R59 Enlarged lymph nodes                                                                   | 29                                    | <5           | 51            | <5           | <5                                | <5           | <5            | <5           |
|                                                      | <b>2. vaccine</b>                                                                          |                                       |              |               |              |                                   |              |               |              |
|                                                      | <b><i>Short (0-56 days)</i></b>                                                            |                                       |              |               |              |                                   |              |               |              |
| Circulatory and respiratory symptoms                 | R00 Abnormalities of heartbeat                                                             | 17                                    | 47           | <5            | <5           | 60                                | <5           | 45            | 19           |
|                                                      | R04 Haemorrhage from respiratory passages                                                  | <5                                    | <5           | <5            | <5           | <5                                | <5           | <5            | <5           |
|                                                      | R05 Cough                                                                                  | <5                                    | 36           | 22            | <5           | 55                                | <5           | 19            | 12           |

|                                                      |                                                                                            |      |      |     |     |      |     |     |     |
|------------------------------------------------------|--------------------------------------------------------------------------------------------|------|------|-----|-----|------|-----|-----|-----|
|                                                      | R06 Abnormalities of breathing                                                             | 94   | 23   | 31  | 31  | 140  | 37  | 54  | 26  |
|                                                      | R07 Pain in throat and chest                                                               | 27   | 86   | 58  | 29  | 88   | 47  | 70  | 44  |
|                                                      | R09 Other symptoms and signs involving the circulatory and respiratory systems             | <5   | <5   | <5  | <5  | <5   | <5  | <5  | <5  |
| Digestive system and abdomen                         | R10 Abdominal and pelvic pain                                                              | 1344 | 381  | 370 | 202 | 2280 | 411 | 824 | 171 |
|                                                      | R11 Nausea and vomiting                                                                    | 22   | 46   | 66  | <5  | 113  | 34  | 55  | 19  |
|                                                      | R13 Dysphagia                                                                              | 7    | 6    | 19  | 13  | 43   | 9   | 14  | <5  |
| Skin and subcutaneous tissue                         | R20 Disturbances of skin sensation                                                         | 7    | <5   | <5  | 5   | 22   | 11  | 8   | <5  |
|                                                      | R21 Rash and other nonspecific skin eruption                                               | 25   | <5   | 16  | <5  | 30   | 6   | 20  | 6   |
|                                                      | R22 Localized swelling, mass and lump of skin and subcutaneous tissue                      | 7    | <5   | 22  | 0   | 18   | <5  | 21  | 5   |
| Cognition, perception, emotional state, and behavior | R41.8 Other and unspecified symptoms and signs involving cognitive functions and awareness | 497  | 323  | 468 | 316 | 615  | 210 | 593 | 171 |
|                                                      | R42 Dizziness and giddiness                                                                | 59   | <5   | 22  | <5  | 86   | 22  | 34  | <5  |
|                                                      | R43 Disturbances of smell and taste                                                        | <5   | <5   | <5  | <5  | <5   | <5  | <5  | <5  |
| General symptoms and signs                           | R50 Fever                                                                                  | 33   | <5   | <5  | <5  | 78   | 21  | 55  | 29  |
|                                                      | R51 Headache                                                                               | 212  | 120  | 76  | 80  | 405  | 106 | 159 | 49  |
|                                                      | R52 Pain                                                                                   | 61   | <5   | 46  | <5  | 159  | 43  | 79  | 19  |
|                                                      | R53 Fatigue                                                                                | 16   | <5   | <5  | <5  | 45   | 14  | <5  | <5  |
|                                                      | R55 Syncope                                                                                | 149  | 37   | 23  | <5  | 182  | 85  | 87  | 36  |
|                                                      | R56 Convulsion                                                                             | <5   | 21   | <5  | <5  | 43   | <5  | 24  | <5  |
|                                                      | R59 Enlarged lymph nodes                                                                   | <5   | <5   | 37  | <5  | <5   | <5  | <5  | 11  |
|                                                      | <b>Long (56-182 days)</b>                                                                  |      |      |     |     |      |     |     |     |
| Circulatory and respiratory symptoms                 | R00 Abnormalities of heartbeat                                                             | <5   | 62   | <5  | 40  | 87   | 56  | 67  | 41  |
|                                                      | R04 Haemorrhage from respiratory passages                                                  | 20   | <5   | <5  | 23  | 19   | 19  | 36  | <5  |
|                                                      | R05 Cough                                                                                  | <5   | 63   | <5  | 47  | 81   | 56  | 26  | 31  |
|                                                      | R06 Abnormalities of breathing                                                             | 138  | 67   | <5  | <5  | 198  | 79  | 80  | 38  |
|                                                      | R07 Pain in throat and chest                                                               | 37   | 250  | 36  | 157 | 128  | 88  | 94  | 72  |
|                                                      | R09 Other symptoms and signs involving the circulatory and respiratory systems             | <5   | <5   | <5  | <5  | <5   | <5  | <5  | <5  |
| Digestive system and abdomen                         | R10 Abdominal and pelvic pain                                                              | 788  | 1247 | 224 | 434 | 1632 | 759 | 611 | 286 |
|                                                      | R11 Nausea and vomiting                                                                    | 67   | 181  | 66  | 49  | 165  | 87  | 81  | 59  |
|                                                      | R13 Dysphagia                                                                              | 5    | <5   | 27  | <5  | 51   | 11  | 18  | 7   |
| Skin and subcutaneous tissue                         | R20 Disturbances of skin sensation                                                         | 7    | 16   | <5  | 0   | 27   | 13  | 11  | 9   |
|                                                      | R21 Rash and other nonspecific skin eruption                                               | 36   | 26   | 18  | 0   | 40   | 21  | 34  | 14  |
|                                                      | R22 Localized swelling, mass and lump of skin and subcutaneous tissue                      | 7    | 49   | 15  | 0   | 27   | 11  | 24  | 9   |
| Cognition, perception, emotional state, and behavior | R41.8 Other and unspecified symptoms and signs involving cognitive functions and awareness | 396  | 560  | 524 | 992 | 760  | 569 | 842 | 417 |
|                                                      | R42 Dizziness and giddiness                                                                | 64   | <5   | 14  | <5  | 132  | 59  | 55  | 15  |
|                                                      | R43 Disturbances of smell and taste                                                        | <5   | <5   | <5  | <5  | <5   | <5  | <5  | <5  |



|                            |                          |     |     |    |     |     |     |     |     |
|----------------------------|--------------------------|-----|-----|----|-----|-----|-----|-----|-----|
| General symptoms and signs | R50 Fever                | 59  | 62  | <5 | 14  | 115 | 35  | 85  | 43  |
|                            | R51 Headache             | 345 | 282 | 82 | 274 | 587 | 229 | 247 | 120 |
|                            | R52 Pain                 | 96  | <5  | 38 | <5  | 211 | 86  | 123 | 52  |
|                            | R53 Fatigue              | <5  | 107 | <5 | <5  | 67  | 24  | 18  | 41  |
|                            | R55 Syncope              | 150 | 225 | 29 | 115 | 275 | 148 | 122 | 87  |
|                            | R56 Convulsion           | <5  | <5  | <5 | <5  | 56  | 31  | 31  | <5  |
|                            | R59 Enlarged lymph nodes | <5  | <5  | 53 | <5  | <5  | <5  | 11  | <5  |

A minimum of 5 events both before and after the index-date is a priori defined as required for the specific category to enter in the analyses. Due to Danish legislation events fewer than five cannot be shown.

<sup>a</sup>Number of events are reported 6 months prior to index-date and 0-21 days after the first vaccine dose and 0-56 days and 57-182 days after the second vaccine dose.
