# Supplementary material for: Symptom-Specific Hospital Contacts in 12–18-Year-Olds Vaccinated against COVID-19: A Danish Register-Based Cohort Study
Source: Vaccines (Basel). 2023 May 31;11(6):1049. doi: 10.3390/vaccines11061049 (PMC10301149; doi:10.3390/vaccines11061049)
Supplement: Supplementary file 1 [file vaccines-11-01049-s001.zip › Supplementary_data.docx]

**Supplemental Information**

Supplement to: Berg SK, Wallach-Kildemoes H, Rasmussen LR, et al. Symptom-specific hospital contacts in 12-18-year-olds vaccinated against COVID-19: A Danish register-based cohort study

[Investigators 2](#_Toc131419787)

[Supplemental Table 1. Selected ICD-10 R codes as outcomes. 3](#_Toc131419788)

[Supplemental Table 2. Joint binary register-based measures for prevalent somatic and psychiatric disorders prior to first dose vaccine index-date, applying hospital diagnosis (ICD 10 codes) and eventually medicine proxies (ATC-codes) with specified look back period. 4](#_Toc131419789)

[Supplemental Table 3. Characteristics of adolescents vaccinated against COVID-19 and matched unvaccinated: First dose during May-September and second dose 3-7 weeks later. 5](#_Toc131419790)

[Supplemental Table 4. PERR and number of symptoms (ICD-10 R-codes) per 1000 person years at risk (rates) 6 months before and 21 days after the first vaccine dose (index-date) among vaccinated and matched unvaccinated adolescents aged 12-18 years. 6](#_Toc131419791)

[Supplemental Table 5. Symptoms for first and second vaccine dose: Events 6 months before and three time periods after vaccination (index-date) among vaccinated and matched unvaccinated adolescents aged 12-18 years, stratified on age-groups. 7](#_Toc131419792)

#

# Investigators

Selina Kikkenborg Berg, Professora,b, Helle Wallach-Kildemoes, PhDa, Line Ryberg Rasmussen, Msca, Ulrikka Nygaard, Associate Professorb,c, Nina Marie Birk, PhDa, Henning Bundgaard, Professora,b, Annette Kjær Ersbøll, Professord,Lau Casper Thygesen, Professord, Susanne Dam Nielsen, Professorb,e, Anne Vinggaard Christensen, Post doca

aDepartment of Cardiology, Rigshospitalet, Copenhagen University Hospital, Inge Lehmanns Vej 7, 2100 Copenhagen, Denmark

bFaculty of Health and Medical Sciences, University of Copenhagen, Blegdamsvej 3B, 2200 Copenhagen N, Denmark

cDepartment of Paediatrics and Adolescents Medicine, Rigshospitalet, Copenhagen University Hospital, Blegdamsvej 9, 2100 Copenhagen, Denmark

dNational Institute of Public Health, University of Southern Denmark, Studiestræde 6, 1455 Copenhagen, Denmark

eDepartment of Infectious Disease, Rigshospitalet, Copenhagen University Hospital, Blegdamsvej 9, 2100 Copenhagen, Denmark

**Corresponding author:**

Professor Selina Kikkenborg Berg
Rigshospitalet

The Heart Centre, Unit 2151
Blegdamsvej 9

2100 Copenhagen
Denmark

Phone: +45 35459526

E-mail: [selina@rh.dk](mailto:selina@rh.dk)

# Supplemental Table 1. Selected ICD-10 R codes as outcomes.

| **R codes categories** | **Specific R codes** |
| --- | --- |
| Circulatory and respiratory symptoms | R00 Abnormalities of heartbeat |
| R04 Haemorrhage from respiratory passages |
| R05 Cough |
| R06 Abnormalities of breathing |
| R07 Pain in throat and chest |
| R09 Other symptoms and signs involving the circulatory and respiratory systems |
| Digestive system and abdomen | R10 Abdominal and pelvic pain |
| R11 Nausea and vomiting |
| R13 Dysphagia |
| Skin and subcutaneous tissue | R20 Disturbances of skin sensation |
| R21 Rash and other nonspecific skin eruption |
| R22 Localized swelling, mass and lump of skin and subcutaneous tissue |
| Cognition, perception, emotional state, and behavior | R41.8 Other and unspecified symptoms and signs involving cognitive functions and awareness |
| R42 Dizziness and giddiness |
| R43 Disturbances of smell and taste |
| General symptoms and signs | R50 Fever of other and unknown origin |
| R51 Headache |
| R52 Pain, not elsewhere classified |
| R53 Malaise and fatigue |
| R55 Syncope and collapse |
| R56 Convulsions, not elsewhere classified |
| R59 Enlarged lymph nodes |

Supplemental Table 2. Joint binary register-based measures for prevalent somatic and psychiatric disorders prior to first dose vaccine index-date, applying hospital diagnosis (ICD 10 codes) and eventually medicine proxies (ATC-codes) with specified look back period.

| **Disorder categories** | **Register-based disorder defintionsa:**  **Prior diagnosis (ICD 10) / filled of prescription drug (ATC)** | **Look back periodb** |
| --- | --- | --- |
| Asthmac | **ICD10** |  |
| J45-J46 | Full |
| **ATC** |  |
| Bronchodilating agents(comb): R03BA; R03AK; R03AL08; R03AL09; R03AL11-12; R03AC12- R03AC19; R03BB01; | Medium |
| Leukotriene receptor antagonist: R03DC03 | Medium |
| Other respiratory disordersc | **ICD10** |  |
| E84; J41-44; J47; J84; J96.1; P27; | Full |
| J40 | Short |
| Cardiovascular disordersc | **ICD10** |  |
| I05-I09; I27; I34-39; I41-I47; I50-I52 | Full |
| I01; I31; I33; I40 | Medium |
| Renal disorders incl. dialysisc | **ICD10:** |  |
| N03; N04-5; N07-8; N18-19; N25-N27; Y84.1 | Full |
| N00-1; N17 | Medium |
| Diabetes mellitus I or IIc | **ICD10:** |  |
| E10-E11; Z96.4 | Full |
| **ATC:** |  |
| A10A | Medium |
| Endocrine disorders. excl. diabetesc | **ICD10** |  |
| E03.3; E03.5-9; E05-06; E27.1; E27.3-4 | Full |
| E27.2 | Short |
| Hematologic disordersc | **ICD10** |  |
| D59.0-1; D69.0; D69.3; D86 | Full |
| Dermatologic diseasesc | **ICD10** |  |
| L10; L12; L13.0 | Medium |
| L20; L40; L63; L80 | Full |
| Rheumatological disordersc | **ICD10** |  |
| M05-M09; M30-36; M45; M60 (excl. M60.0) | Full |
| Neuromuscular disordersc | **ICD10** |  |
| G35-37; G70-71; G80; G82 | Full |
| G61; | Medium |
| Gastrointestinal disorders incl. cirrhosis (any cause)c | **ICD10** |  |
| K50-51; K70.2-3; K71.7; K74; K76.1; K78.8; K900; | Full |
| K35 | Short |
| Congenital malformations and chromosomal abnormalitiesc | **ICD10** |  |
| Q20-28; Q31-34; Q90-95 | Full |
| Malignancyc | **ICD10** |  |
| C00-97 | Full |
| **ATC** |  |
| L01 | Full |
| Organ transplantation or immunodeficiencyc | **ICD 10** |  |
| Organ transplantation: Z94 excl. Z94.5. Z94.7 | Full |
| Immunodeficiency: D70-72; D730; D80-84 | Full |
| **ATC** |  |
| L04 | Full |
| Psychiatric disordersd | ICD10 |  |
| F (any psychiatric primary diagnoses) | Full |

aIndividuals with a list of disorders within a look back period prior to survey completion date were identified, applying individual-level register information, corresponding to primary discharge diagnoses (ICD-10 codes) and/or prescription drug use disease proxies (ATC codes). The list includes somatic health conditions in adolescents conferring an increased risk of SARS-CoV-2 infection46 along with any psychiatric discharge disorders.
bLooking back periods from the index-date: Full (ICD: full historic); Medium (ICD: 1 year; ATC: 6 months); Short (ICD: 3 months; ATC: 2 month); Very short: 14 days (ICD & ATC).
cA joint binary measure for prevalent somatic disorder: Yes (Yes in any of the listed prevalent disorders) No (No as to all included prevalent disorders).
dA joint measure for prevalent psychiatric disorder.

# Supplemental Table 3. Characteristics of adolescents vaccinated against COVID-19 and matched unvaccinated: First dose during May-September and second dose 3-7 weeks later.

| Category | First dose vaccinea | | Second dose vaccineb | | | |
| --- | --- | --- | --- | --- | --- | --- |
| **Vaccinated** | **Unvaccinated** | **Vaccinated** | **Unvaccinated according to follow-up** | | |
| **0-21 days** | **0-56 days** | **57-182 days** |
| All n (%)c | (n=109,166) | (n=109,166) | (n=105,316) | (n=105,316) | (n=105,316) | (n=105,316) |
| Unique individuals, n (%)d | 109,166 (100.0%) | 27,106 (39.4%) | 105,316 (100.0%) | 25,415 (24.1%) | 21,833 (20.7%) | 14,007 (13.3%) |
| Sex (Girl, %) | 53,423 (48.9%) | 53,423 (48.9%) | 51,665 (49.1%) | 51,665 (49.1%) | 51,665 (49.1%) | 51,665 (49.1%) |
| Age (mean, SD) | 15.6 (1.9) | 15.4 (2.1) | 15.5 (1.9) | 15.4 (2.1) | 15.4 (2.1) | 15.4 (2.1) |
| 12 - 15 years (%) | 47,719 (43.7%) | 47,719 (43.7%) | 46,733 (44.4%) | 46,733 (44.4%) | 46,733 (44.4%) | 46,733 (44.4%) |
| 16 - 18 years (%) | 61,447 (56.3%) | 61,447 (56.3%) | 58,583 (55.6%) | 58,583 (55.6%) | 58,583 (55.6%) | 58,583 (55.6%) |
| Prevalent health condition, n/yes (%)e |  |  |  |  |  |  |
| Any of listed somatic diseases | 14,456 (13.2%) | 12,961 (11.9%) | 13,971 (13.3%) | 12,220 (11.6%) | 12,324 (11.7%) | 12,197 (11.6%) |
| Any registered psychiatric diagnosis | 8780 (8.0%) | 10,054 (9.2%) | 8377 (8.0%) | 9966 (9.5%) | 10,284 (9.8%) | 10,468 (9.9%) |
| Parental socio-economic position |  |  |  |  |  |  |
| Highest formal parental education, n (%) |  |  |  |  |  |  |
| Basic education | 5087 (4.7%) | 13,098 (12.0%) | 4737 (4.5%) | 14,890 (14.1%) | 15,230 (14.5%) | 17,631 (16.7%) |
| High school and vocational training | 44,777 (41.0%) | 50,522 (46.3%) | 43,245 (41.1%) | 49,746 (47.2%) | 50,777 (48.2%) | 52,260 (49.6%) |
| Higher education | 59,302 (54.3%) | 45,546 (41.7%) | 57,334 (54.4%) | 40,680 (38.6%) | 39,309 (37.3%) | 35,425 (33.6%) |
| Annual family income, n (%) |  |  |  |  |  |  |
| Low (1. tertile) | 29,055 (26.6%) | 50,078 (45.9%) | 27,615 (26.2%) | 53,858 (51.1%) | 54,884 (52.1%) | 59,961 (56.9%) |
| Middle (2. tertile) | 34,172 (31.3%) | 31,824 (29.2%) | 33,168 (31.5%) | 29,595 (28.1%) | 29,734 (28.2%) | 28,450 (27.0%) |
| High (3. tertile) | 45,359 (41.6%) | 26,296 (24.1%) | 43,984 (41.8%) | 20,857 (19.8%) | 19,715 (18.7%) | 15,901 (15.1%) |
| Maternal citizenship, n (%) |  |  |  |  |  |  |
| Danish | 101,063 (92.6%) | 89,218 (81.7%) | 97,754 (92.8%) | 82,554 (78.4%) | 82,037 (77.9%) | 78,905 (74.9%) |
| Other Western countries | 3261 (3.0%) | 5194 (4.8%) | 3089 (2.9%) | 5685 (5.4%) | 5922 (5.6%) | 6778 (6.4%) |
| Non-western countries | 4621 (4.2%) | 14,160 (13.0%) | 4277 (4.1%) | 16,409 (15.6%) | 16,684 (15.8%) | 18,928 (18.0%) |
| Unknown | 221 (0.2%) | 594 (0.5%) | 196 (0.2%) | 668 (0.6%) | 673 (0.6%) | 705 (0.7%) |

aApplying matching with replacement, unvaccinated were each week during the inclusion period (May-September 2021) matched to first dose vaccinated according to sex and age-group. Hence, unvaccinated may receive the vaccine during the inclusion period and be matched with an individual still unvaccinated. By the end of the inclusion period 27,058 unique individuals were still unvaccinated.

bApplying matching with replacement, unvaccinated were each week matched to second dose vaccinated according to sex and age-group. Merely individuals not receiving first dose vaccine during the respective follow-up periods were included.
cMatched number of index-date records applied in the analyses. Individuals still unvaccinated may have been assigned several index-dates. Index-date among vaccinated = date of vaccination. Prevalent health conditions and parental socio-economic position are based on these matched number of index-date records.

dNumber unique individual applied for the matching. By the end of the inclusion period 27,058 individuals had not received first dose vaccine.
eSomatic or psychiatric disorders registered prior to first dose vaccine index-date: For details see Supplemental Table 2.

# Supplemental Table 4. PERRa and number of symptoms (ICD-10 R-codes)b per 1000 person years at risk (rates) 6 months before and 21 days after the first vaccine dose (index-date) among vaccinated and matched unvaccinated adolescents aged 12-18 years.

|  | **Girls** | | | | | | **Boys** | | | | | |
| --- | --- | --- | --- | --- | --- | --- | --- | --- | --- | --- | --- | --- |
| **Unvaccinated (Rate)** | | **Vaccinated**  **(Rate)** | |  | | **Unvaccinated (Rate)** | | **Vaccinated**  **(Rate)** | |  | |
| **before** | **after** | **before** | **after** | **PERR crude** | **PERR (95% CI)c** | **before** | **after** | **before** | **after** | **PERR crude** | **PERR (95% CI)c** |
| **1. Vaccine** |  |  |  |  |  |  |  |  |  |  |  |  |
| ***(0-21 days)*** |  |  |  |  |  |  |  |  |  |  |  |  |
| R00 Abnormalities of heartbeat | 1.67 | 1.95 | 2.24 | 2.93 | 1.12 | 1.23 (0.34-#) | - | - | - | - | - | - |
| R06 Abnormalities of breathing | 5.93 | 11.06 | 5.31 | 4.23 | 0.43 | 0.35 (0.14-1.26) | - | - | - | - | - | - |
| R07 Pain in throat and chest | 3.37 | 9.76 | 3.48 | 4.23 | 0.42 | 0.46 (0.18-1.05) | 3.53 | 2.49 | 2.62 | 6.86 | 3.71 | 4.70 (1.68-21.33) |
| R10 Abdominal and pelvic pain | 47.41 | 42.95 | 44.54 | 38.08 | 0.94 | 0.91 (0.65-1.42) | 15.84 | 18.40 | 15.27 | 14.66 | 0.83 | 0.90 (0.46-1.84) |
| R21 Rash and other nonspecific skin eruption | - | - | - | - | - | - | 0.71 | 2.18 | 0.75 | 1.56 | 0.68 | 0.63 (0.11-4.08) |
| R41.8 Other and unspecified symptoms and signs involving cognitive functions and awareness | 39.01 | 20.82 | 23.48 | 21.81 | 1.74 | 1.72 (1.10-2.96) | 33.05 | 41.17 | 23.22 | 19.34 | 0.67 | 0.61 (0.32-1.45) |
| R42 Dizziness and giddiness | 3.04 | 3.25 | 3.44 | 2.60 | 0.71 | 0.86 (0.11-#) | - | - | - | - | - | - |

aPERR (Prior event rate ratio) = Ratio after (Vaccinated Rate after/Unvaccinated Rate after) divided by the Ratio before (Vaccinated Rate before/Unvaccinated Rate before).
bFor the number of events for each symptom see Supplemental Table 5.
vBy means of Poisson regression models, the ratio before and after is adjusted for time with SARS-CoV-2 infection in the follow-up period, highest attained parental education and age group (12-15 years and 16-18 years during inclusion period). 95% confidence interval (CI) of the PERR estimate through Bootstrapping with 200 replicates.
# Not possible to calculate the upper 95% CI (e.g., e+07).

# Supplemental Table 5. Symptoms for first and second vaccine dose: Events 6 months before and three time periodsa after vaccination (index-date) among vaccinated and matched unvaccinated adolescents aged 12-18 years, stratified on age-groups.

| **Diagnoses by length of follow-up period** | | **Non-vaccinated: Events (before/after)** | | | | **Vaccinated: Events (before/after)** | | | |
| --- | --- | --- | --- | --- | --- | --- | --- | --- | --- |
| **Girls** | | **Boys** | | **Girls** | | **Boys** | |
| **12-18** | | **12-18** | | **12-18** | | **12-18** | |
| *before* | *after* | *before* | *after* | *before* | *after* | *before* | *after* |
|  | **1. vaccine** |  |  |  |  |  |  |  |  |
|  | ***Very-short (0-21 days)*** |  |  |  |  |  |  |  |  |
| Circulatory and respiratory symptoms | R00 Abnormalities of heartbeat | 45 | 6 | 29 | <5 | 60 | 9 | 47 | 10 |
| R04 Haemorrhage from respiratory passages | 37 | 0 | 14 | <5 | 13 | <5 | 24 | 5 |
| R05 Cough | 35 | <5 | 29 | 0 | 55 | <5 | 21 | <5 |
| R06 Abnormalities of breathing | 160 | 34 | 57 | 9 | 142 | 13 | 56 | <5 |
| R07 Pain in throat and chest | 91 | 30 | 99 | 8 | 93 | 13 | 73 | 22 |
| R09 Other symptoms and signs involving the circulatory and respiratory systems | 8 | 0 | 0 | 0 | <5 | 0 | 0 | 0 |
| Digestive system and abdomen | R10 Abdominal and pelvic pain | 1277 | 132 | 445 | 59 | 1191 | 117 | 426 | 47 |
| R11 Nausea and vomiting | 97 | <5 | 97 | <5 | 107 | 9 | 59 | <5 |
| R13 Dysphagia | 17 | <5 | 30 | <5 | 38 | 0 | 14 | 0 |
| Skin and subcutaneous tissue | R20 Disturbances of skin sensation | 18 | 5 | 10 | <5 | 23 | <5 | 8 | 0 |
| R21 Rash and other nonspecific skin eruption | 33 | 8 | 20 | 7 | 30 | <5 | 21 | 5 |
| R22 Localized swelling, mass and lump of skin and subcutaneous tissue | 14 | <5 | 24 | <5 | 18 | <5 | 22 | 5 |
| Cognition, perception, emotional state, and behavior | R41.8 Other and unspecified symptoms and signs involving cognitive functions and awareness | 1052 | 64 | 928 | 132 | 628 | 67 | 648 | 62 |
| R42 Dizziness and giddiness | 82 | 10 | 46 | 6 | 92 | 8 | 36 | <5 |
| R43 Disturbances of smell and taste | 20 | 0 | <5 | 0 | 5 | 0 | 9 | <5 |
| General symptoms and signs | R50 Fever | 93 | 15 | 24 | <5 | 76 | <5 | 55 | <5 |
| R51Headache | 433 | 38 | 128 | 27 | 408 | 35 | 163 | 15 |
| R52 Pain | 116 | <5 | 84 | 12 | 171 | 11 | 83 | <5 |
| R53 Fatigue | 34 | <5 | 10 | <5 | 46 | <5 | <5 | <5 |
| R55 Syncope | 284 | 44 | 61 | <5 | 187 | 32 | 87 | 21 |
| R56 Convulsion | 29 | <5 | <5 | <5 | 43 | <5 | 24 | <5 |
| R59 Enlarged lymph nodes | 29 | <5 | 51 | <5 | <5 | <5 | <5 | <5 |
|  | **2. vaccine** |  | |  | |  | |  | |
|  | ***Short (0-56 days)*** |  | |  | |  | |  | |
| Circulatory and respiratory symptoms | R00 Abnormalities of heartbeat | 17 | 47 | <5 | <5 | 60 | <5 | 45 | 19 |
| R04 Haemorrhage from respiratory passages | <5 | <5 | <5 | <5 | <5 | <5 | <5 | <5 |
| R05 Cough | <5 | 36 | 22 | <5 | 55 | <5 | 19 | 12 |
| R06 Abnormalities of breathing | 94 | 23 | 31 | 31 | 140 | 37 | 54 | 26 |
| R07 Pain in throat and chest | 27 | 86 | 58 | 29 | 88 | 47 | 70 | 44 |
| R09 Other symptoms and signs involving the circulatory and respiratory systems | <5 | <5 | <5 | <5 | <5 | <5 | <5 | <5 |
| Digestive system and abdomen | R10 Abdominal and pelvic pain | 1344 | 381 | 370 | 202 | 2280 | 411 | 824 | 171 |
| R11 Nausea and vomiting | 22 | 46 | 66 | <5 | 113 | 34 | 55 | 19 |
| R13 Dysphagia | 7 | 6 | 19 | 13 | 43 | 9 | 14 | <5 |
| Skin and subcutaneous tissue | R20 Disturbances of skin sensation | 7 | <5 | <5 | 5 | 22 | 11 | 8 | <5 |
| R21 Rash and other nonspecific skin eruption | 25 | <5 | 16 | <5 | 30 | 6 | 20 | 6 |
| R22 Localized swelling, mass and lump of skin and subcutaneous tissue | 7 | <5 | 22 | 0 | 18 | <5 | 21 | 5 |
| Cognition, perception, emotional state, and behavior | R41.8 Other and unspecified symptoms and signs involving cognitive functions and awareness | 497 | 323 | 468 | 316 | 615 | 210 | 593 | 171 |
| R42 Dizziness and giddiness | 59 | <5 | 22 | <5 | 86 | 22 | 34 | <5 |
| R43 Disturbances of smell and taste | <5 | <5 | <5 | <5 | <5 | <5 | <5 | <5 |
| General symptoms and signs | R50 Fever | 33 | <5 | <5 | <5 | 78 | 21 | 55 | 29 |
| R51 Headache | 212 | 120 | 76 | 80 | 405 | 106 | 159 | 49 |
| R52 Pain | 61 | <5 | 46 | <5 | 159 | 43 | 79 | 19 |
| R53 Fatigue | 16 | <5 | <5 | <5 | 45 | 14 | <5 | <5 |
| R55 Syncope | 149 | 37 | 23 | <5 | 182 | 85 | 87 | 36 |
| R56 Convulsion | <5 | 21 | <5 | <5 | 43 | <5 | 24 | <5 |
| R59 Enlarged lymph nodes | <5 | <5 | 37 | <5 | <5 | <5 | <5 | 11 |
|  | ***Long (56-182 days)*** |  | |  | |  | |  | |
| Circulatory and respiratory symptoms | R00 Abnormalities of heartbeat | <5 | 62 | <5 | 40 | 87 | 56 | 67 | 41 |
| R04 Haemorrhage from respiratory passages | 20 | <5 | <5 | 23 | 19 | 19 | 36 | <5 |
| R05 Cough | <5 | 63 | <5 | 47 | 81 | 56 | 26 | 31 |
| R06 Abnormalities of breathing | 138 | 67 | <5 | <5 | 198 | 79 | 80 | 38 |
| R07 Pain in throat and chest | 37 | 250 | 36 | 157 | 128 | 88 | 94 | 72 |
| R09 Other symptoms and signs involving the circulatory and respiratory systems | <5 | <5 | <5 | <5 | <5 | <5 | <5 | <5 |
| Digestive system and abdomen | R10 Abdominal and pelvic pain | 788 | 1247 | 224 | 434 | 1632 | 759 | 611 | 286 |
| R11 Nausea and vomiting | 67 | 181 | 66 | 49 | 165 | 87 | 81 | 59 |
| R13 Dysphagia | 5 | <5 | 27 | <5 | 51 | 11 | 18 | 7 |
| Skin and subcutaneous tissue | R20 Disturbances of skin sensation | 7 | 16 | <5 | 0 | 27 | 13 | 11 | 9 |
| R21 Rash and other nonspecific skin eruption | 36 | 26 | 18 | 0 | 40 | 21 | 34 | 14 |
| R22 Localized swelling, mass and lump of skin and subcutaneous tissue | 7 | 49 | 15 | 0 | 27 | 11 | 24 | 9 |
| Cognition, perception, emotional state, and behavior | R41.8 Other and unspecified symptoms and signs involving cognitive functions and awareness | 396 | 560 | 524 | 992 | 760 | 569 | 842 | 417 |
| R42 Dizziness and giddiness | 64 | <5 | 14 | <5 | 132 | 59 | 55 | 15 |
| R43 Disturbances of smell and taste | <5 | <5 | <5 | <5 | <5 | <5 | <5 | <5 |
| General symptoms and signs | R50 Fever | 59 | 62 | <5 | 14 | 115 | 35 | 85 | 43 |
| R51 Headache | 345 | 282 | 82 | 274 | 587 | 229 | 247 | 120 |
| R52 Pain | 96 | <5 | 38 | <5 | 211 | 86 | 123 | 52 |
| R53 Fatigue | <5 | 107 | <5 | <5 | 67 | 24 | 18 | 41 |
| R55 Syncope | 150 | 225 | 29 | 115 | 275 | 148 | 122 | 87 |
| R56 Convulsion | <5 | <5 | <5 | <5 | 56 | 31 | 31 | <5 |
| R59 Enlarged lymph nodes | <5 | <5 | 53 | <5 | <5 | <5 | 11 | <5 |

A minimum of 5 events both before and after the index-date is a priori defined as required for the specific category to enter in the analyses. Due to Danish legislation events fewer than five cannot be shown.

aNumber of events are reported 6 months prior to index-date and 0-21 days after the first vaccine dose and 0-56 days and 57-182 days after the second vaccine dose.
